# Supplementary material
Source: Springer Nature journal article supplement (https://www.springermedizin.de/resource/supplementary/12889_2010_2604_MOESM1_ESM.pdf/9486650)
Supplement: MOESM1 [file 9486650]

Singleton, live births with birth weight,  
from 1 urban and 5 rural sub-districts

Antenatal SRQ 0 or 1

Antenatal SRQ 2 to 5

Antenatal SRQ  $\geq 6$

N = 260

N = 227

N = 68

Random sample

All

N = 95

N = 95

N = 68

Excluding Butajira sub-district and birth weights > 48 hours

N = 86

N = 78

N = 61

3 died  
2 missing

1 died  
4 missing  
1 migrated  
2 unreliable

1 missing

N = 81

N = 70

N = 60

4 ill

8 ill

5 ill

Infants assessed with Bayley at 12 months

N = 77

N = 62

N = 55
